# Supplementary material for: The mechanochemical synthesis of environmentally benign fully biobased 4th generation benzoxazines and their polymers: mechanistic insights into the catalytic activity of latent catalysts
Source: Royal Society of Chemistry journal article supplement (doi:10.1039/d3gc03522k), 2023-12-11
Supplement: d3gc03522k1.pdf [file d3gc03522k1.pdf]

Supporting Information

# Mechanochemical Synthesis of Environmentally Benign Fully Biobased 4th Generation Benzoxazines and their Polymers: Mechanistic Insights Into Latent Catalyst Effect

Vaishaly Duhan,<sup>1</sup> Shivani Yadav,<sup>1</sup> Christophe Len<sup>2,3</sup> and Bimlesh Lochab<sup>1\*</sup>

<sup>1</sup>Materials Chemistry Laboratory, Department of Chemistry, School of Natural Sciences, Shiv Nadar Institution of Eminence, Gautam Buddha Nagar, Uttar Pradesh 201314, India.

<sup>2</sup>School of Chemistry, Xi'an Jiaotong University, 28 Xianning West Road, Xi'an (China)

<sup>3</sup>Institute of Chemistry for Life and Health Sciences, Chimie ParisTech, PSL Research University, 11 rue Pierre et Marie Curie, Paris (France)

TOTAL: 16 Pages, 3 Table and 16 Figures

|                                                                                                                                                                                                                                                |   |
|------------------------------------------------------------------------------------------------------------------------------------------------------------------------------------------------------------------------------------------------|---|
| <b>Fig. S1</b> FTIR spectra of monomers. ....                                                                                                                                                                                                  | 3 |
| <b>Fig. S2</b> NMR spectra of oV- <i>fa</i> -[2]ph monomer: (a) <sup>1</sup> H and (b) <sup>13</sup> C NMR. ....                                                                                                                               | 3 |
| <b>Fig. S3</b> NMR spectra of oV- <i>fa</i> -[2]v monomer: (a) <sup>1</sup> H and (b) <sup>13</sup> C. ....                                                                                                                                    | 4 |
| <b>Fig. S4</b> NMR spectra of oV- <i>fa</i> -[2]ph: (a) 2D <sup>1</sup> H- <sup>1</sup> H COSY; (b) Stacked <sup>13</sup> C and DEPT 45/90/135; (c) 2D <sup>1</sup> H- <sup>13</sup> C HMBC; (d) 2D <sup>1</sup> H- <sup>13</sup> C HSQC. .... | 5 |
| <b>Fig. S5</b> NMR spectra of oV- <i>fa</i> -[2]ov: (a) 2D <sup>1</sup> H- <sup>1</sup> H COSY; (b) Stacked <sup>13</sup> C and DEPT 45/90/135; (c) 2D <sup>1</sup> H- <sup>13</sup> C HMBC; (d) 2D <sup>1</sup> H- <sup>13</sup> C HSQC. .... | 6 |
| <b>Fig. S6</b> NMR spectra of oV- <i>fa</i> -[2]v: (a) 2D <sup>1</sup> H- <sup>1</sup> H COSY; (b) Stacked <sup>13</sup> C and DEPT 45/90/135; (c) 2D <sup>1</sup> H- <sup>13</sup> C HMBC; (d) 2D <sup>1</sup> H- <sup>13</sup> C HSQC. ....  | 7 |
| <b>Fig. S7</b> HRMS spectra of monomers. ....                                                                                                                                                                                                  | 8 |

|                                                                                                                                                                                                                                                                                                                                                                                                     |    |
|-----------------------------------------------------------------------------------------------------------------------------------------------------------------------------------------------------------------------------------------------------------------------------------------------------------------------------------------------------------------------------------------------------|----|
| <b>Fig. S8</b> ORTEP diagram of oV- <i>fa</i> -[2]ov at 40 °C. ....                                                                                                                                                                                                                                                                                                                                 | 9  |
| <b>Table S1</b> Crystal data for compound oV- <i>fa</i> -[2]ov. (CCDC: 2291158 (16 °C), 2291159 (40 °C) and 2291694 (70 °C) contain the supplementary crystallographic data for this paper. These data can be obtained free of charge from The Cambridge Crystallographic Data Centre (CCDC) via <a href="http://www.ccdc.cam.ac.uk/data_request/cif">www.ccdc.cam.ac.uk/data_request/cif</a> ..... | 9  |
| <b>Table S2</b> GC-MS method applied for all the monomers. ....                                                                                                                                                                                                                                                                                                                                     | 10 |
| <b>Table S3</b> Parameters from DSC thermograms of monomers recorded at various heating rates.....                                                                                                                                                                                                                                                                                                  | 11 |
| <b>Fig. S9</b> Stacked FTIR spectra of non-isothermally polymerized monomers. (a) oV- <i>fa</i> -[2]ph, (b) oV- <i>fa</i> -[2]ov, and (c) oV- <i>fa</i> -[2]v. ....                                                                                                                                                                                                                                 | 11 |
| <b>Synthesis of cardanol based benzoxazine monomer (C-a)<sup>1</sup></b> .....                                                                                                                                                                                                                                                                                                                      | 12 |
| <b>Fig. S10</b> NMR spectra of C-a monomer: (a) <sup>1</sup> H and (b) <sup>13</sup> C.....                                                                                                                                                                                                                                                                                                         | 12 |
| <b>Fig. S11.</b> Variation in swelling ratio with time for (a) poly(oV- <i>fa</i> -[2]ph), (b) poly(oV- <i>fa</i> -[2]ov), (c) poly(oV- <i>fa</i> -[2]v), (a') poly(O <sub>p1</sub> Ca <sub>1</sub> ), (b') poly(O <sub>o1</sub> Ca <sub>3</sub> ) and (c') poly(O <sub>v1</sub> Ca <sub>3</sub> ) .....                                                                                            | 13 |
| <b>Fig. S12</b> Storage modulus (log G') and loss modulus (log G'') plots of homo and copolymers: (a) poly(oV- <i>fa</i> -[2]ph) and its copolymer, (b) poly(oV- <i>fa</i> -[2]ov) and its copolymer, and (c) poly(oV- <i>fa</i> -[2]v) and its copolymer. ....                                                                                                                                     | 13 |
| <b>Fig. S13</b> DSC thermograms of the monomer blends. Heating rate of 10 °C min <sup>-1</sup> under N <sub>2</sub> atmosphere. ....                                                                                                                                                                                                                                                                | 14 |
| <b>Fig. S14</b> TGA and DTG plots for the copolymers (a) poly(oV- <i>fa</i> -[2]ph), (b) poly(oV- <i>fa</i> -[2]ov), (c) poly(oV- <i>fa</i> -[2]v), at a heating rate of 10 °C min <sup>-1</sup> , under an inert N <sub>2</sub> atmosphere. ....                                                                                                                                                   | 14 |
| <b>Fig. S15</b> Representative digital images of the samples for mechanical properties [l × w × h: (65 ± 0.1) mm × (10 ± 0.1) mm × 5 mm].....                                                                                                                                                                                                                                                       | 15 |
| <b>Fig. S16</b> Mechanical properties of bare polybenzoxazine thermoset of cardanol-aniline and its blend with 4 <sup>th</sup> generation benzoxazines. Curves for (a) tensile stress vs tensile strain, and (b) load vs extension of different samples. Variation in (c) tensile strength, (d) modulus (above) and elongation at break (below).....                                                | 16 |

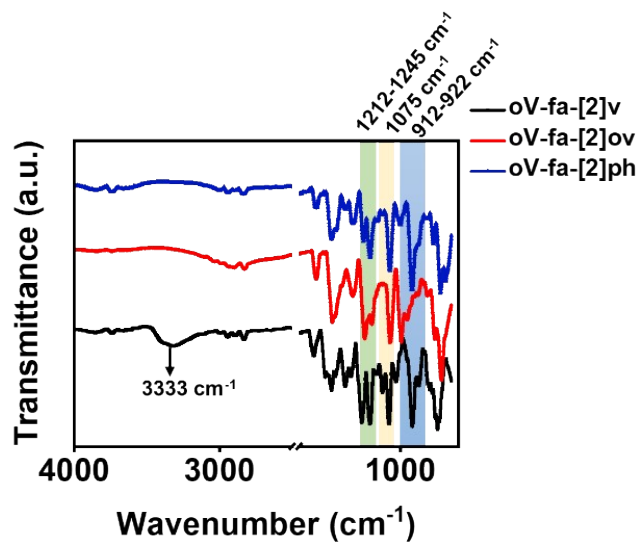

Fig. S1 FTIR spectra of monomers.

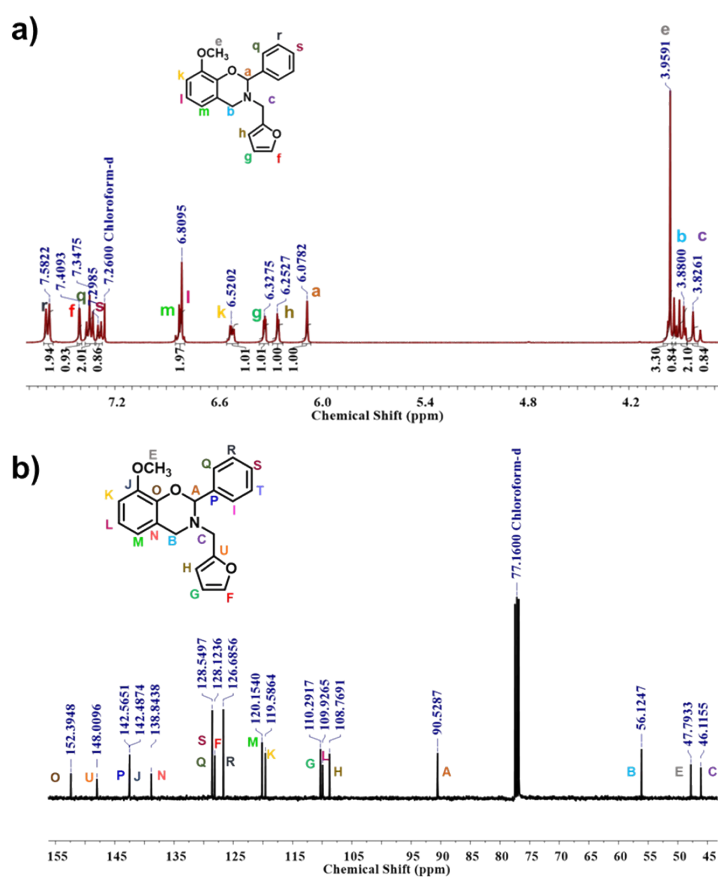

Fig. S2 NMR spectra of oV-fa-[2]ph monomer: (a)  $^1\text{H}$  and (b)  $^{13}\text{C}$  NMR.

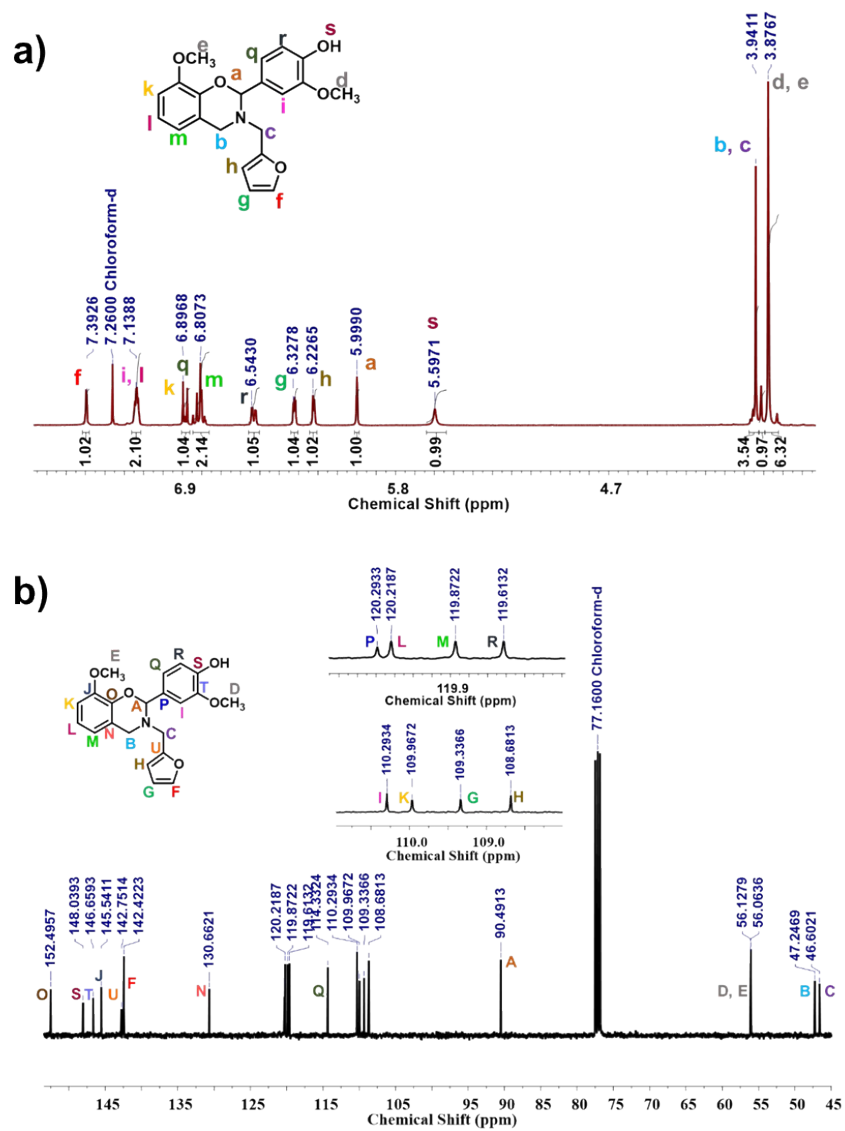

**Fig. S3** NMR spectra of *oV-fa*-[2]*v* monomer: (a)  $^1\text{H}$  and (b)  $^{13}\text{C}$ .

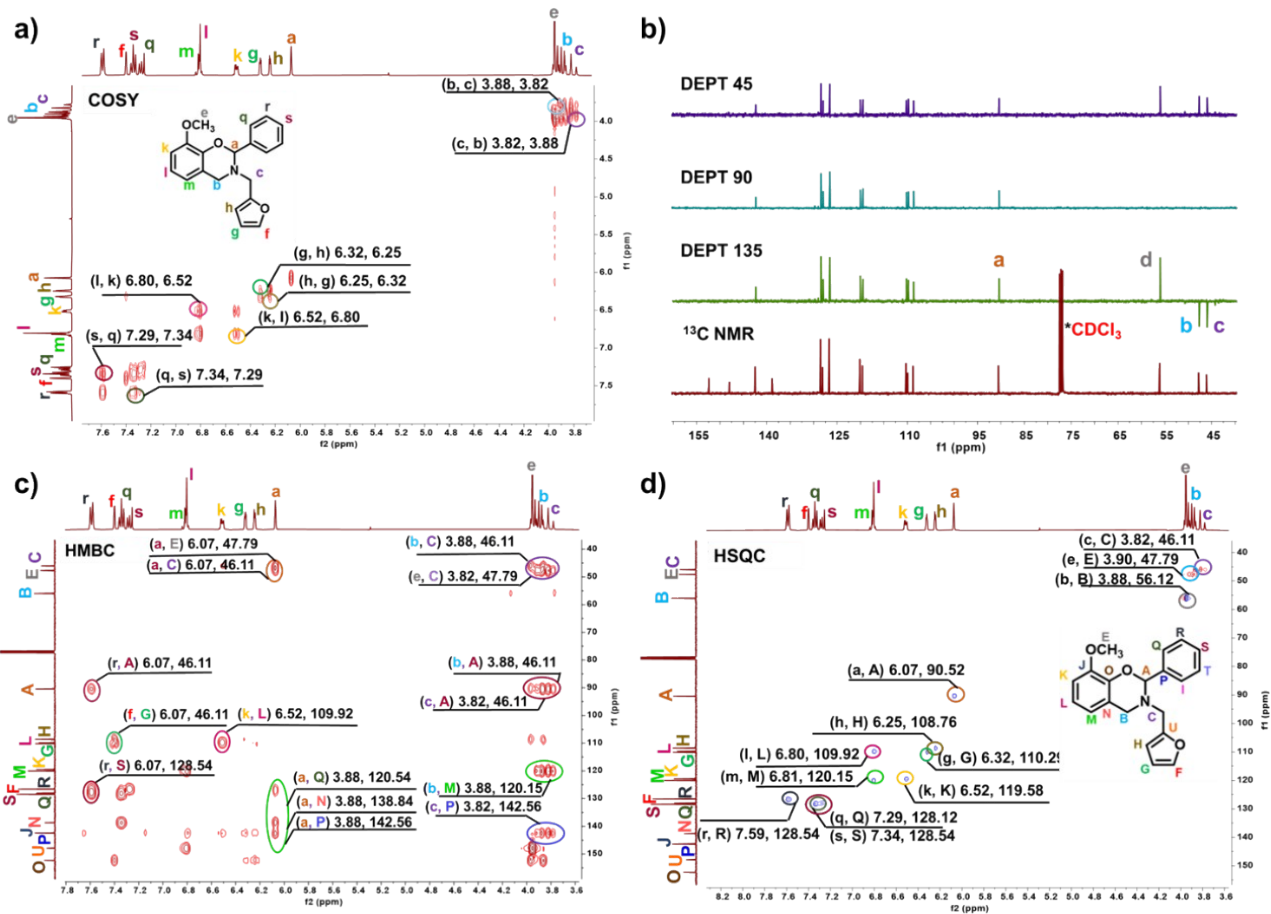

**Fig. S4** NMR spectra of *oV-fa*-[2]ph: (a) 2D  $^1\text{H}$ - $^1\text{H}$  COSY; (b) Stacked  $^{13}\text{C}$  and DEPT 45/90/135; (c) 2D  $^1\text{H}$ - $^{13}\text{C}$  HMBC; (d) 2D  $^1\text{H}$ - $^{13}\text{C}$  HSQC.

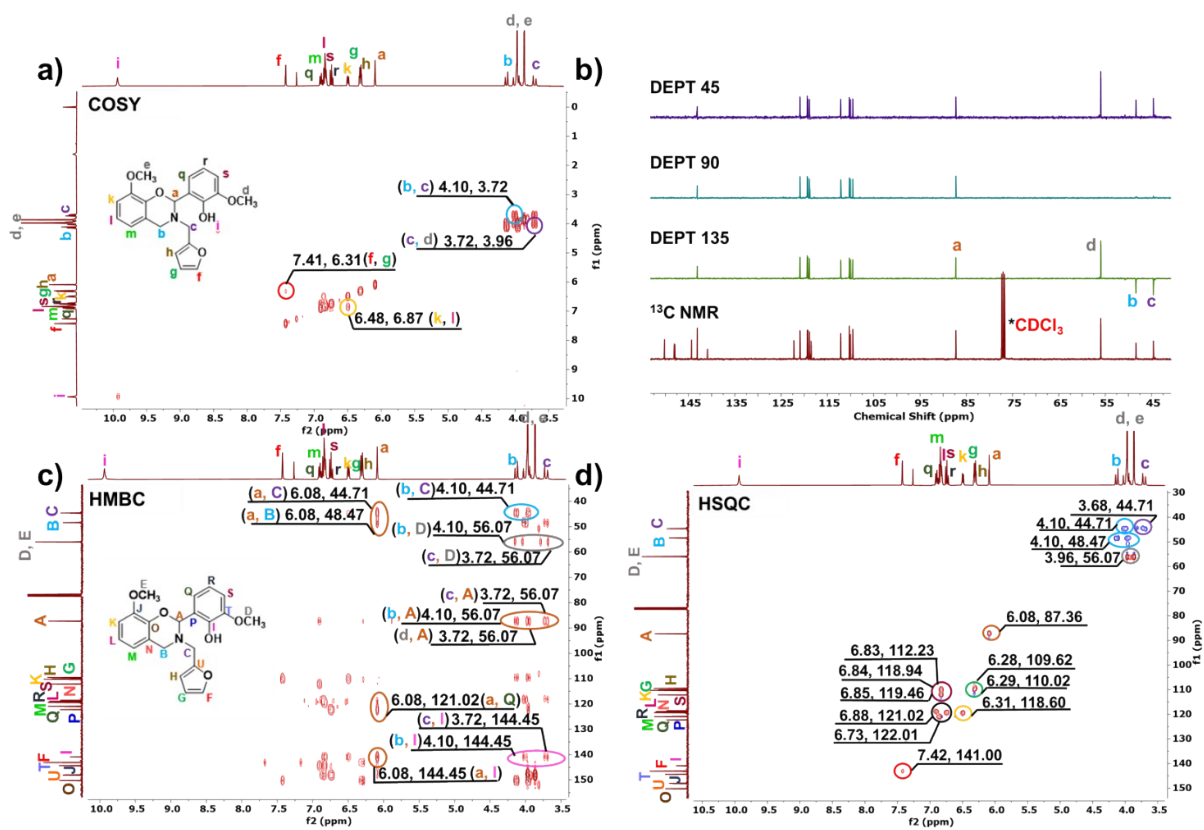

**Fig. S5** NMR spectra of oV-fa-[2]ov: (a) 2D  $^1\text{H}$ - $^1\text{H}$  COSY; (b) Stacked  $^{13}\text{C}$  and DEPT 45/90/135; (c) 2D  $^1\text{H}$ - $^{13}\text{C}$  HMBC; (d) 2D  $^1\text{H}$ - $^{13}\text{C}$  HSQC.

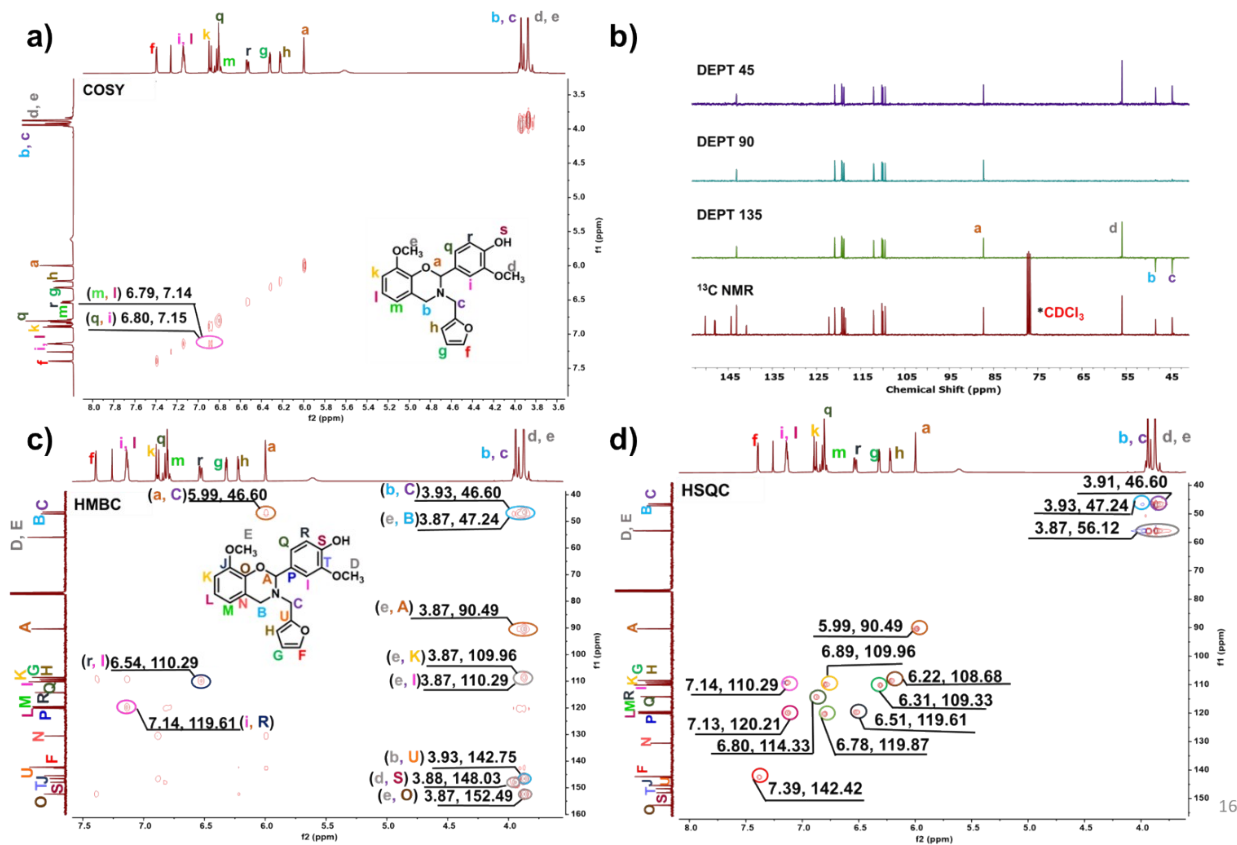

**Fig. S6** NMR spectra of oV-fa-[2]v: (a) 2D  $^1\text{H}$ - $^1\text{H}$  COSY; (b) Stacked  $^{13}\text{C}$  and DEPT 45/90/135; (c) 2D  $^1\text{H}$ - $^{13}\text{C}$  HMBC; (d) 2D  $^1\text{H}$ - $^{13}\text{C}$  HSQC.

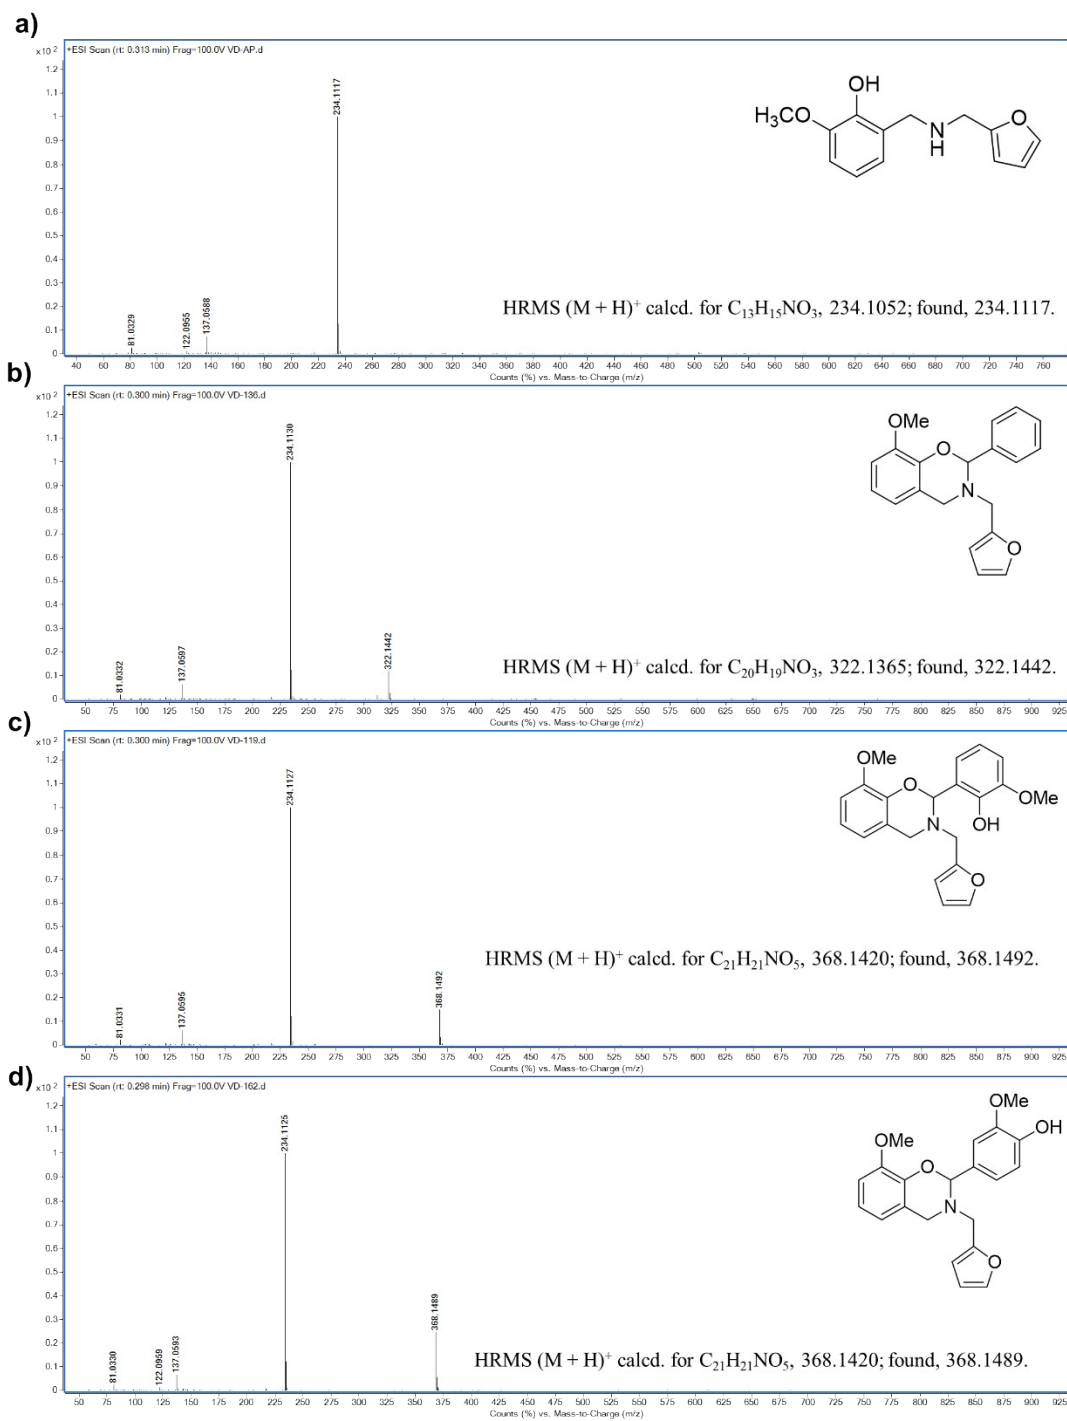

**Fig. S7** HRMS spectra of monomers.



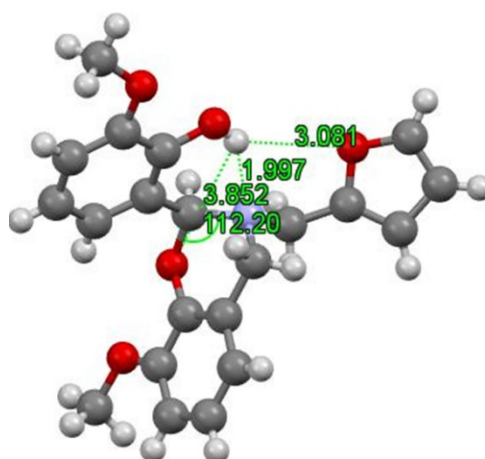

**Fig. S8** ORTEP diagram of oV-*fa*-[2]ov at 40 °C.

**Table S1** Crystal data for compound oV-*fa*-[2]ov. (CCDC: 2291158 (16 °C), 2291159 (40 °C) and 2291694 (70 °C) contain the supplementary crystallographic data for this paper. These data can be obtained free of charge from The Cambridge Crystallographic Data Centre (CCDC) via [www.ccdc.cam.ac.uk/data\\_request/cif](http://www.ccdc.cam.ac.uk/data_request/cif)

| Empirical formula           | C <sub>21</sub> H <sub>21</sub> N O <sub>5</sub>                                                  | C <sub>21</sub> H <sub>21</sub> N O <sub>5</sub>                                                   | C <sub>21</sub> H <sub>21</sub> N O <sub>5</sub>                                                  |
|-----------------------------|---------------------------------------------------------------------------------------------------|----------------------------------------------------------------------------------------------------|---------------------------------------------------------------------------------------------------|
| Formula weight              | 367.39                                                                                            | 367.39                                                                                             | 367.39                                                                                            |
| Temperature                 | 289(2)                                                                                            | 313(2)                                                                                             | 343(2)                                                                                            |
| Wavelength (Å)              | 0.71073                                                                                           | 0.71073                                                                                            | 0.71073                                                                                           |
| R <sub>int</sub> (all data) | 0.0549                                                                                            | 0.0730                                                                                             | 0.0821                                                                                            |
| Crystal system              | triclinic                                                                                         | triclinic                                                                                          | triclinic                                                                                         |
| Space group                 | P <sub>-1</sub>                                                                                   | P <sub>-1</sub>                                                                                    | P <sub>-1</sub>                                                                                   |
| Unit cell dimensions        | a = 7.9414(6), α = 71.148°(3)<br>b = 9.2292(7), β = 82.961°(3)<br>c = 13.4539(11), γ = 81.232°(3) | a = 7.9467(3), α = 71.2010°(10)<br>b = 9.2458(4), β = 83.031°(2)<br>c = 13.4593(5), γ = 81.265°(2) | a = 7.9609(7), α = 71.232°(3)<br>b = 9.2958(7), β = 83.063°(3)<br>c = 13.4749(11), γ = 81.143°(3) |
| Volume (Å <sup>3</sup> )    | 919.44(13)                                                                                        | 922.52(6)                                                                                          | 930.19(12)                                                                                        |

|                                         |                                    |                                    |                                    |
|-----------------------------------------|------------------------------------|------------------------------------|------------------------------------|
| <b>Z</b>                                | 2                                  | 2                                  | 2                                  |
| <b>Density</b>                          | 1.327                              | 1.323                              | 1.297                              |
| <b>Absorption coefficient</b>           | 0.095                              | 0.095                              | 0.092                              |
| <b>F (000)</b>                          | 388                                | 388                                | 380                                |
| <b>Crystal size</b>                     | 0.210 X 0.140 X 0.098              | 0.450 X 0.420X 0.410               | 0.56X 0.540X 0.450                 |
| <b>Theta max</b>                        | 26.393                             | 30.311                             | 30.283                             |
| <b>Theta min</b>                        | 2.398                              | 2.344                              | 2.332                              |
| <b>Reflections collected</b>            | 34555                              | 5444                               | 5182                               |
| <b>Independent reflections</b>          | 2553                               | 2532                               | 1872                               |
| <b>Absorption correction</b>            | SHELXL-2018/3<br>(Sheldrick, 2018) | SHELXL-2018/3<br>(Sheldrick, 2018) | SHELXL-2018/3<br>(Sheldrick, 2018) |
| <b>Max. and min. Transmission</b>       | 0.9705 and 0.9158                  | 0.962 and 0.959                    | 0.963 and 0.960                    |
| <b>Goodness-of-fit on F<sup>2</sup></b> | 1.175                              | 1.059                              | 1.310                              |
| <b>R1</b>                               | 0.0518                             | 0.0747                             | 0.2792                             |
| <b>wR2</b>                              | 0.1603                             | 0.2045                             | 0.4978                             |

**Table S2** GC-MS method applied for all the monomers.

| Ramp | Initial oven temp (°C) | Final oven temp (°C) | Heating rate (°C/min) | Hold time (min) | Total run time (min) |
|------|------------------------|----------------------|-----------------------|-----------------|----------------------|
| I    | 50                     | 50                   | 0                     | 1               | 1                    |
| II   | 50                     | 150                  | 10                    | 5               | 16                   |
| III  | 150                    | 300                  | 10                    | 0               | 31                   |

**Table S3** Parameters from DSC thermograms of monomers recorded at various heating rates.

| Heating rate<br>(°C min <sup>-1</sup> ) | $T_p$ (°C)      |                 |                |
|-----------------------------------------|-----------------|-----------------|----------------|
|                                         | oV-fa-<br>[2]ph | oV-fa-<br>[2]ov | oV-fa-<br>[2]v |
| 5                                       | 200             | 178             | 167            |
| 7.5                                     | 208             | 181             | 172            |
| 10                                      | 214             | 187             | 181            |
| 15                                      | 215             | 193             | 190            |
| 20                                      | 226             | 199             | 197            |

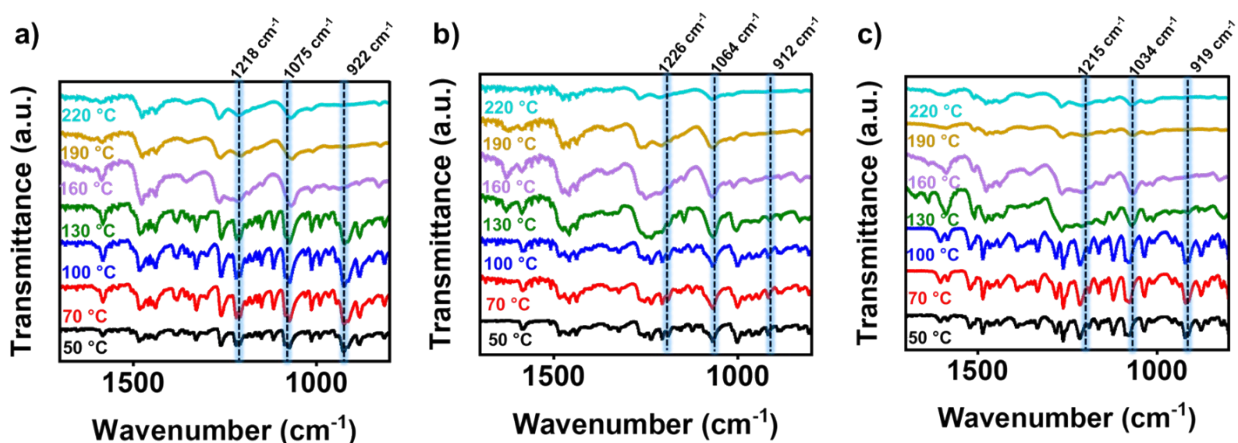

**Fig. S9** Stacked FTIR spectra of non-isothermally polymerized monomers. (a) oV-*fa*-[2]ph, (b) oV-*fa*-[2]ov, and (c) oV-*fa*-[2]v.

### Synthesis of cardanol based benzoxazine monomer (C-a)<sup>1</sup>

To a stirring mixture of cardanol (5.00 g, 16.61 mol), paraformaldehyde (1.00 g, 33.22 mmol), aniline (1.51 mL, 16.61 mol) was gradually added before heating it slowly from room temperature to 80 °C and then at 90 °C for 1 and 2 h, respectively. Thereafter water (10 mL) was added, and the organic layer was extracted with ethyl acetate (3 × 20 mL). The combined organic layers were washed with aqueous sodium hydroxide (0.5 N, 100 mL) before the addition of sodium sulfate. After filtering, solvent was reduced *in vacuo* to yield C-a as a red oil (92%); FTIR-ATR (diamond crystal/cm<sup>-1</sup>) 3008, 2926, 2852, 1620, 1595, 1573, 1365, 1257, 1224, 1111, 1036, 990, and 960; <sup>1</sup>H NMR (400 MHz, CDCl<sub>3</sub>, ppm): 1.01 (CH<sub>3</sub>, t), 1.41 [(CH<sub>2</sub>)<sub>n</sub>, m], 1.67, 2.13 (CH<sub>2</sub>CH=, m), 2.49 (CH<sub>2</sub>Ar, t), 2.92 [CH<sub>2</sub>(CH=)<sub>2</sub>, m], 4.67 (s, ArCH<sub>2</sub>N-), 5.41 (-CH=CH=, dd), 5.30-5.41 (m, CH=, CH<sub>2</sub>=CH-, -OCH<sub>2</sub>N-, -HC=CH<sub>2</sub>), 6.75(ArH, s), 6.82(ArH, d), 7.00 (ArH, m), 7.20 (ArH, d), 7.34 (ArH, m); <sup>13</sup>C NMR (100 MHz, CDCl<sub>3</sub>, ppm): 50.45 (ArCH<sub>2</sub>N), 79.45 (-OCH<sub>2</sub>N-).

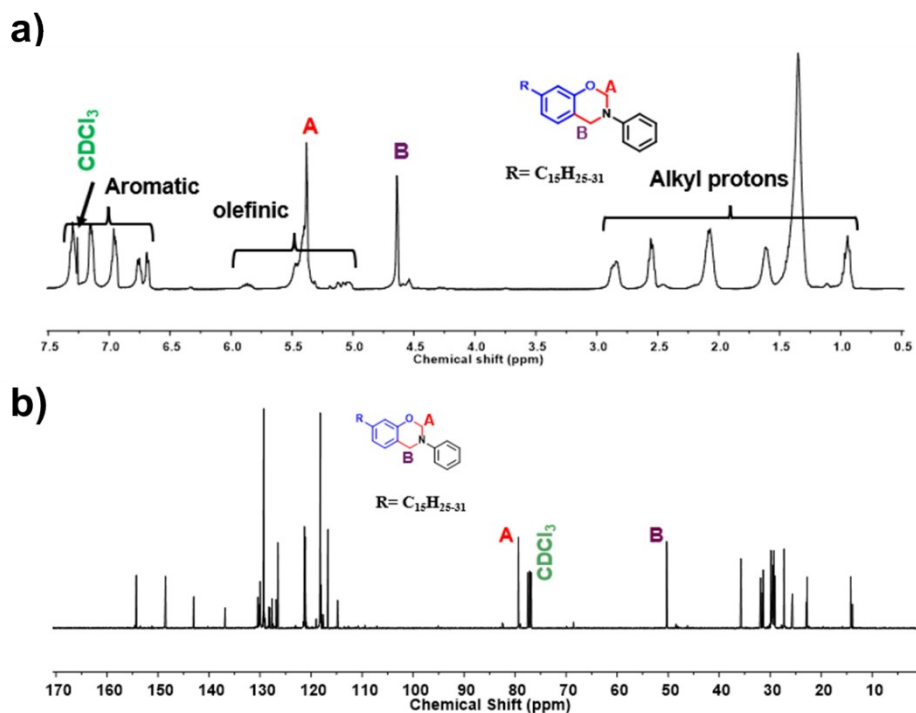

**Fig. S10** NMR spectra of C-a monomer: (a)  $^1\text{H}$  and (b)  $^{13}\text{C}$ .

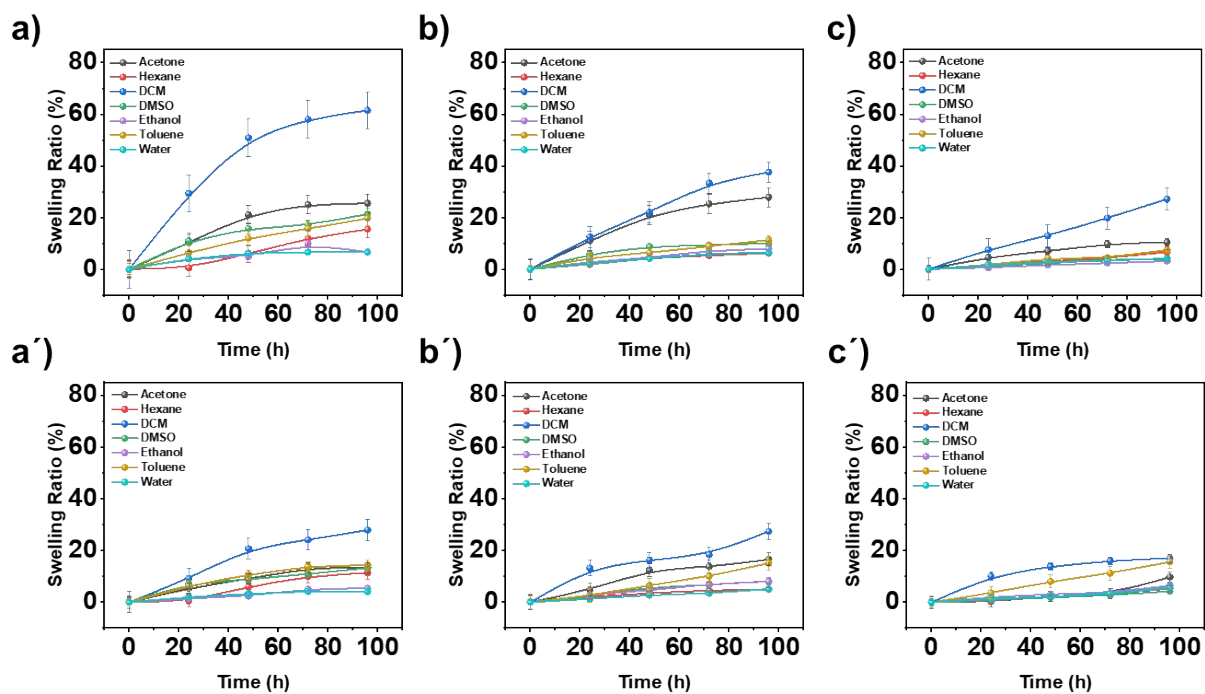

**Fig. S11.** Variation in swelling ratio with time for (a) poly(oV-fa-[2]ph), (b) poly(oV-fa-[2]ov), (c) poly(oV-fa-[2]v), (a') poly(O<sub>p1</sub>Ca<sub>1</sub>), (b') poly(O<sub>o1</sub>Ca<sub>3</sub>) and (c') poly(O<sub>v1</sub>Ca<sub>3</sub>) .

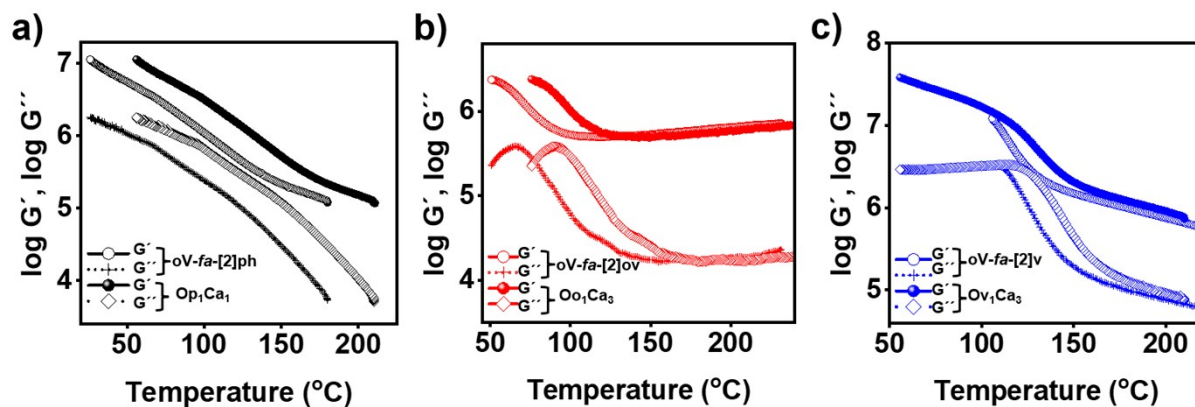

**Fig. S12** Storage modulus ( $\log G'$ ) and loss modulus ( $\log G''$ ) plots of homo and copolymers: (a) poly(oV-fa-[2]ph) and its copolymer, (b) poly(oV-fa-[2]ov) and its copolymer, and (c) poly(oV-fa-[2]v) and its copolymer.

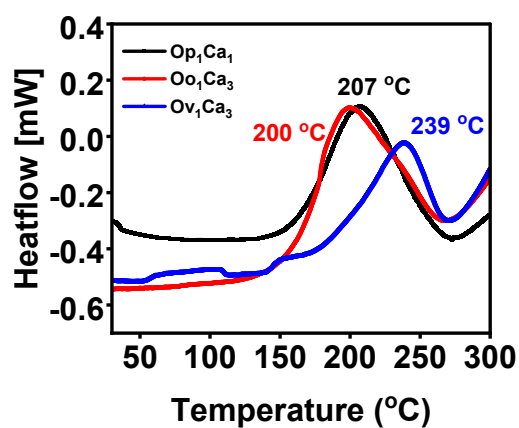

**Fig. S13** DSC thermograms of the monomer blends. Heating rate of  $10\text{ }^{\circ}\text{C min}^{-1}$  under  $\text{N}_2$  atmosphere.

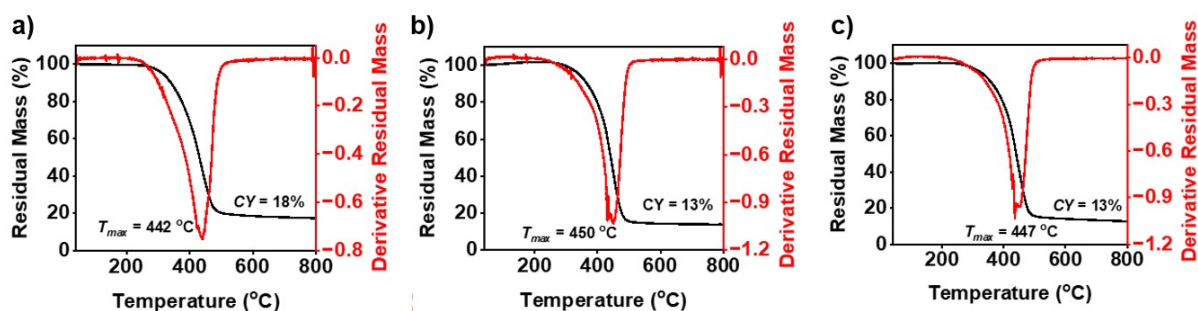

**Fig. S14** TGA and DTG plots for the copolymers (a) poly(oV-fa-[2]ph), (b) poly(oV-fa-[2]ov), (c) poly(oV-fa-[2]v), at a heating rate of  $10\text{ }^{\circ}\text{C min}^{-1}$ , under an inert  $\text{N}_2$  atmosphere.

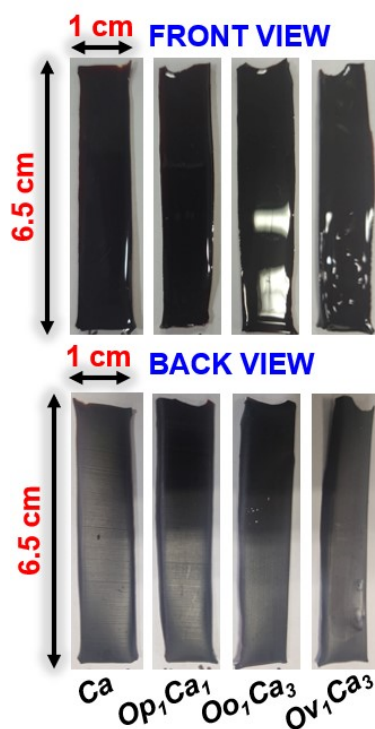

**Fig. S15** Representative digital images of the samples for mechanical properties [ $l \times w \times h$ :  $(65 \pm 0.1)\text{ mm} \times (10 \pm 0.1)\text{ mm} \times 5\text{ mm}$ ].

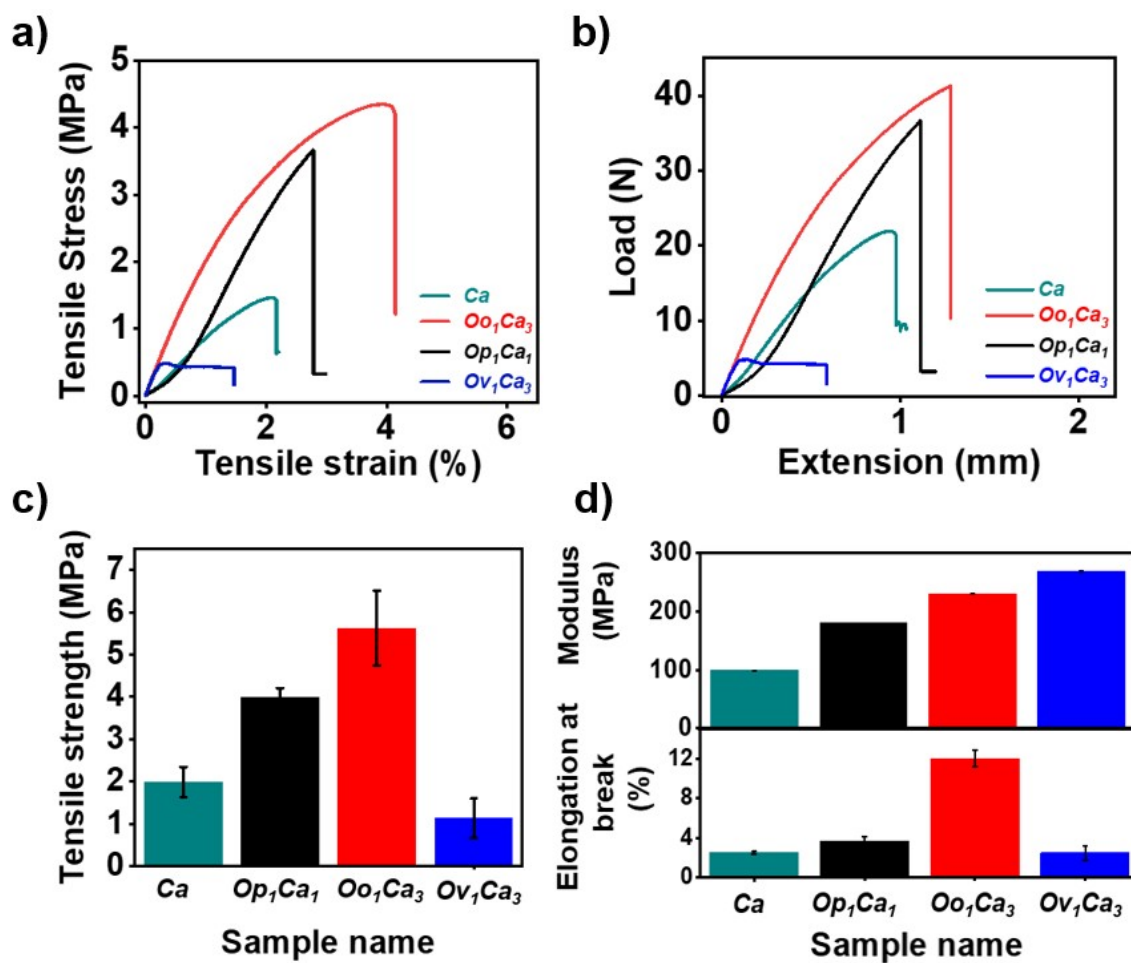

**Fig. S16** Mechanical properties of bare polybenzoxazine thermoset of cardanol-aniline and its blend with 4<sup>th</sup> generation benzoxazines. Curves for (a) tensile stress vs tensile strain, and (b) load vs extension of different samples. Variation in (c) tensile strength, (d) modulus (above) and elongation at break (below).

## References

1. S. Shukla, A. Mahata, B. Pathak and B. Lochab, *RSC Adv.*, 2015, **5**, 78071-78080.
